# Supplementary material
Source: PubMed Central journal article supplement (PMC7485578)

---

**Supplement Figure 1: “Cytokine Storm” in *PubMed* Search 1985- May 2020**

The figure represents the number of articles entered in *PubMed* from 1985 to May 2020. This marks several events that have led to cytokine storm including the 1985 original description in graft versus host disease, a small increase during the 2003-2005 SARS-CoV, a more significant number for the 2009 - 2010 H1N109 and the ongoing rise of publications associated with SARS-CoV-2.

Journal Pre-proof

**Supplement Figure 1: "Cytokine Storm" in PubMed Search 1985- May 2020**

The figure represents the number of articles entered in PubMed from 1985 to May 2020. This marks several events that have led to cytokine storm including the 1985 original description in graft versus host disease, a small increase during the 2003-2005 SARS-CoV, a more significant number for the 2009 - 2010 H1N109 and the ongoing rise of publications associated with SARS-CoV-2.

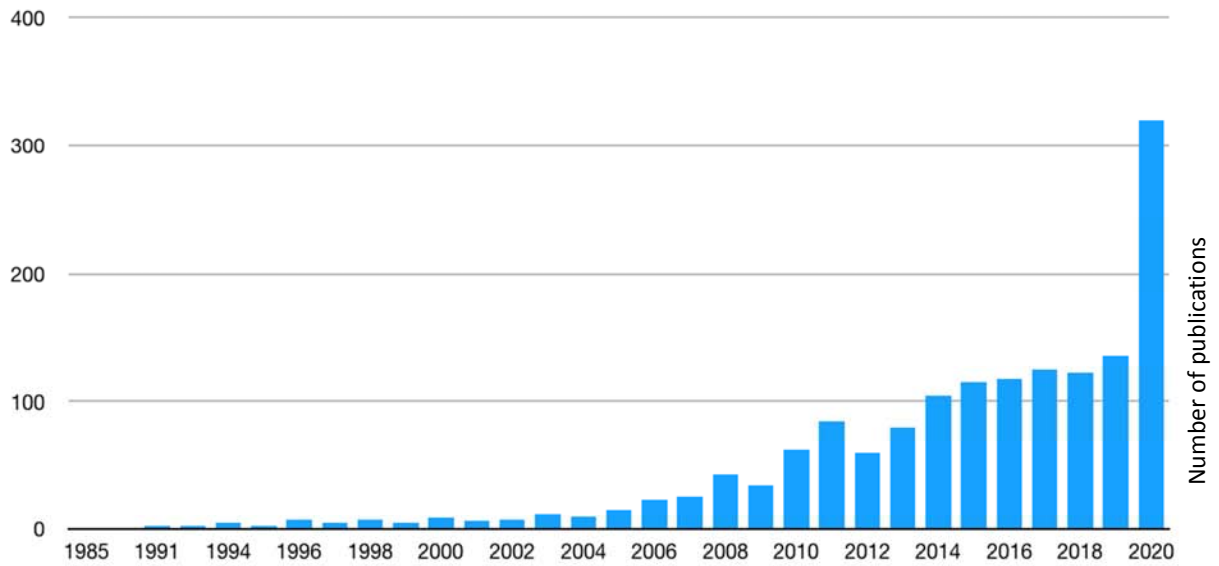

Supplement: NIHMS1611618-supplement-1.pdf [file NIHMS1611618-supplement-1.pdf]
